# Supplementary material
Source: Research Square preprint supplement (doi:10.21203/rs.3.rs-9183115/v1)
Supplement: Supplementary file 1 [file 6d920543f34442eb619ac680.doc]

Table S1 Ecological region, and soil type and basic soil fertility in the 0-20 cm soil layer in different experimental sites

| Site | Location | Ecological region | Latitude | Soil type | PH | Organic matter（mg/kg） | Alkaline  hydrolyzable nitrogen（mg/kg） | Available phosphorus（mg/kg） | Available potassium（mg/kg） |
| --- | --- | --- | --- | --- | --- | --- | --- | --- | --- |
| HS | Hengshui Jizhou | Southern Hebei | 37°55′N | Fluvo-aquic soil | 7.43 | 13.68 | 80.27 | 74.22 | 604.67 |
| BD | Baoding Laishui | Central Hebei | 38°80′N | Cinnamon soil | 7.43 | 15.17 | 73.50 | 7.67 | 101.00 |
| TS | Tangshan Luanxian | Eastern Hebei | 39°35′N | Fluvo-cinnamon soil | 7.25 | 10.09 | 54.83 | 22.27 | 137.00 |
| QHD | Qinhuangdao Changli | Eastern Hebei | 39°42′N | Brown soil | 7.04 | 19.27 | 84.23 | 94.25 | 133.00 |
| CD | Chengde Weichang | Northern Hebei | 41°35′N | Cinnamon soil | 7.06 | 11.86 | 70.70 | 19.64 | 133.00 |


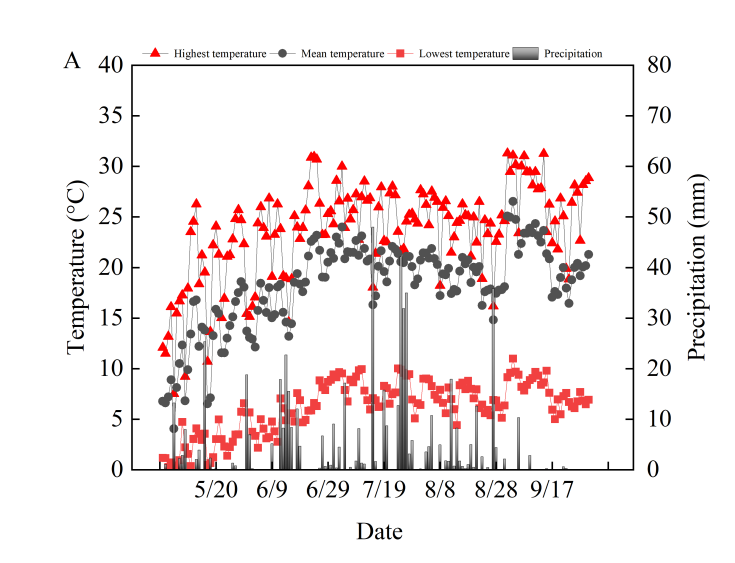

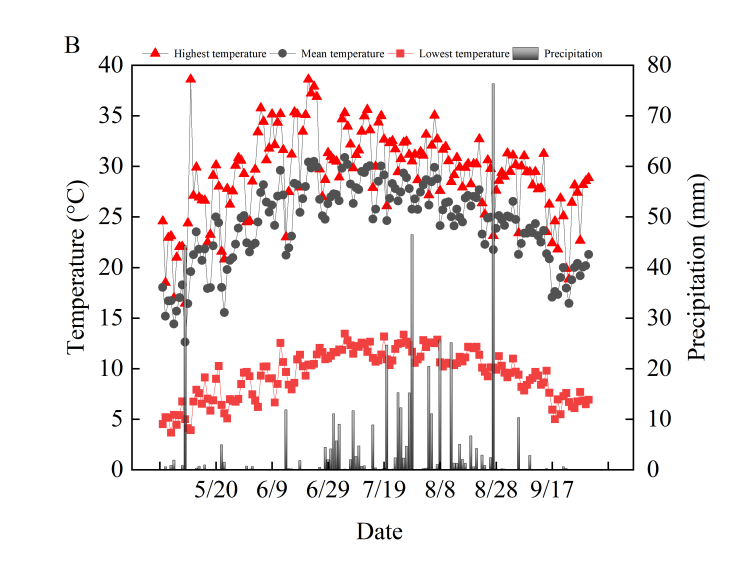


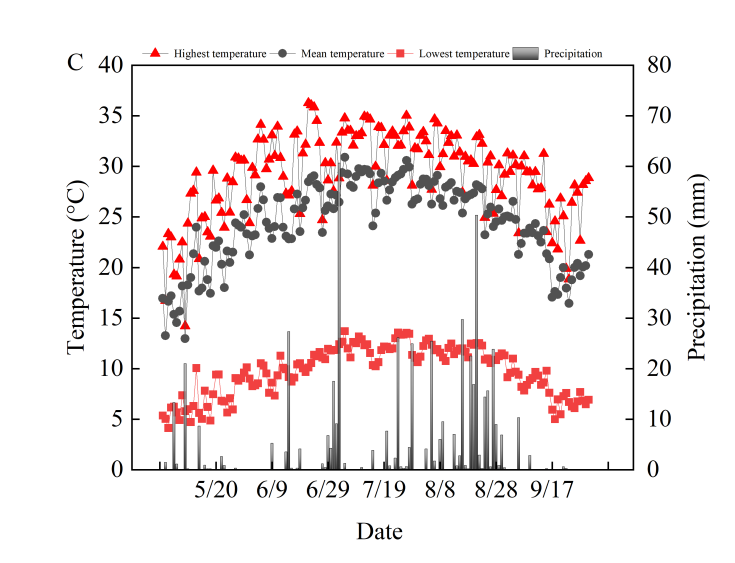

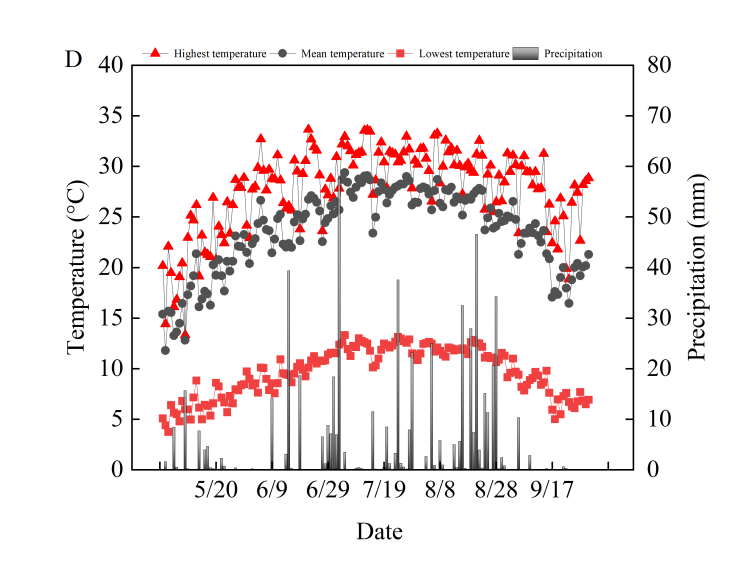


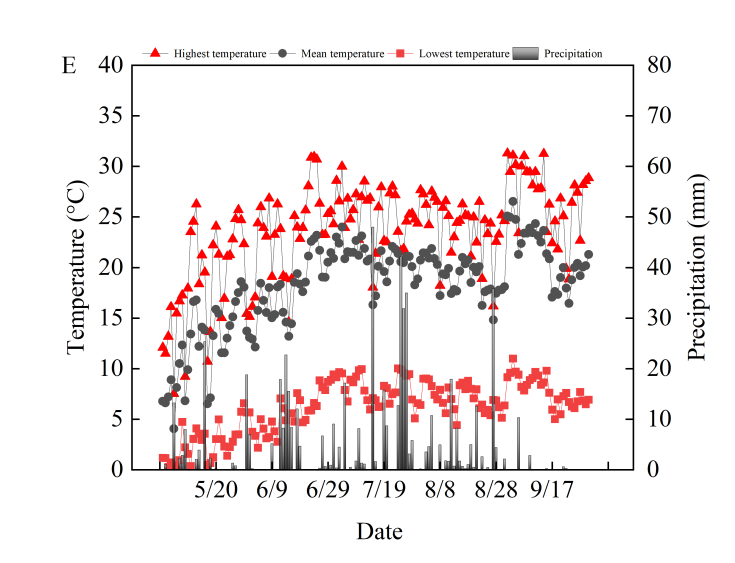


Fig. S1 Monthly variations in air temperature and precipitation from May to September at different experimental sites


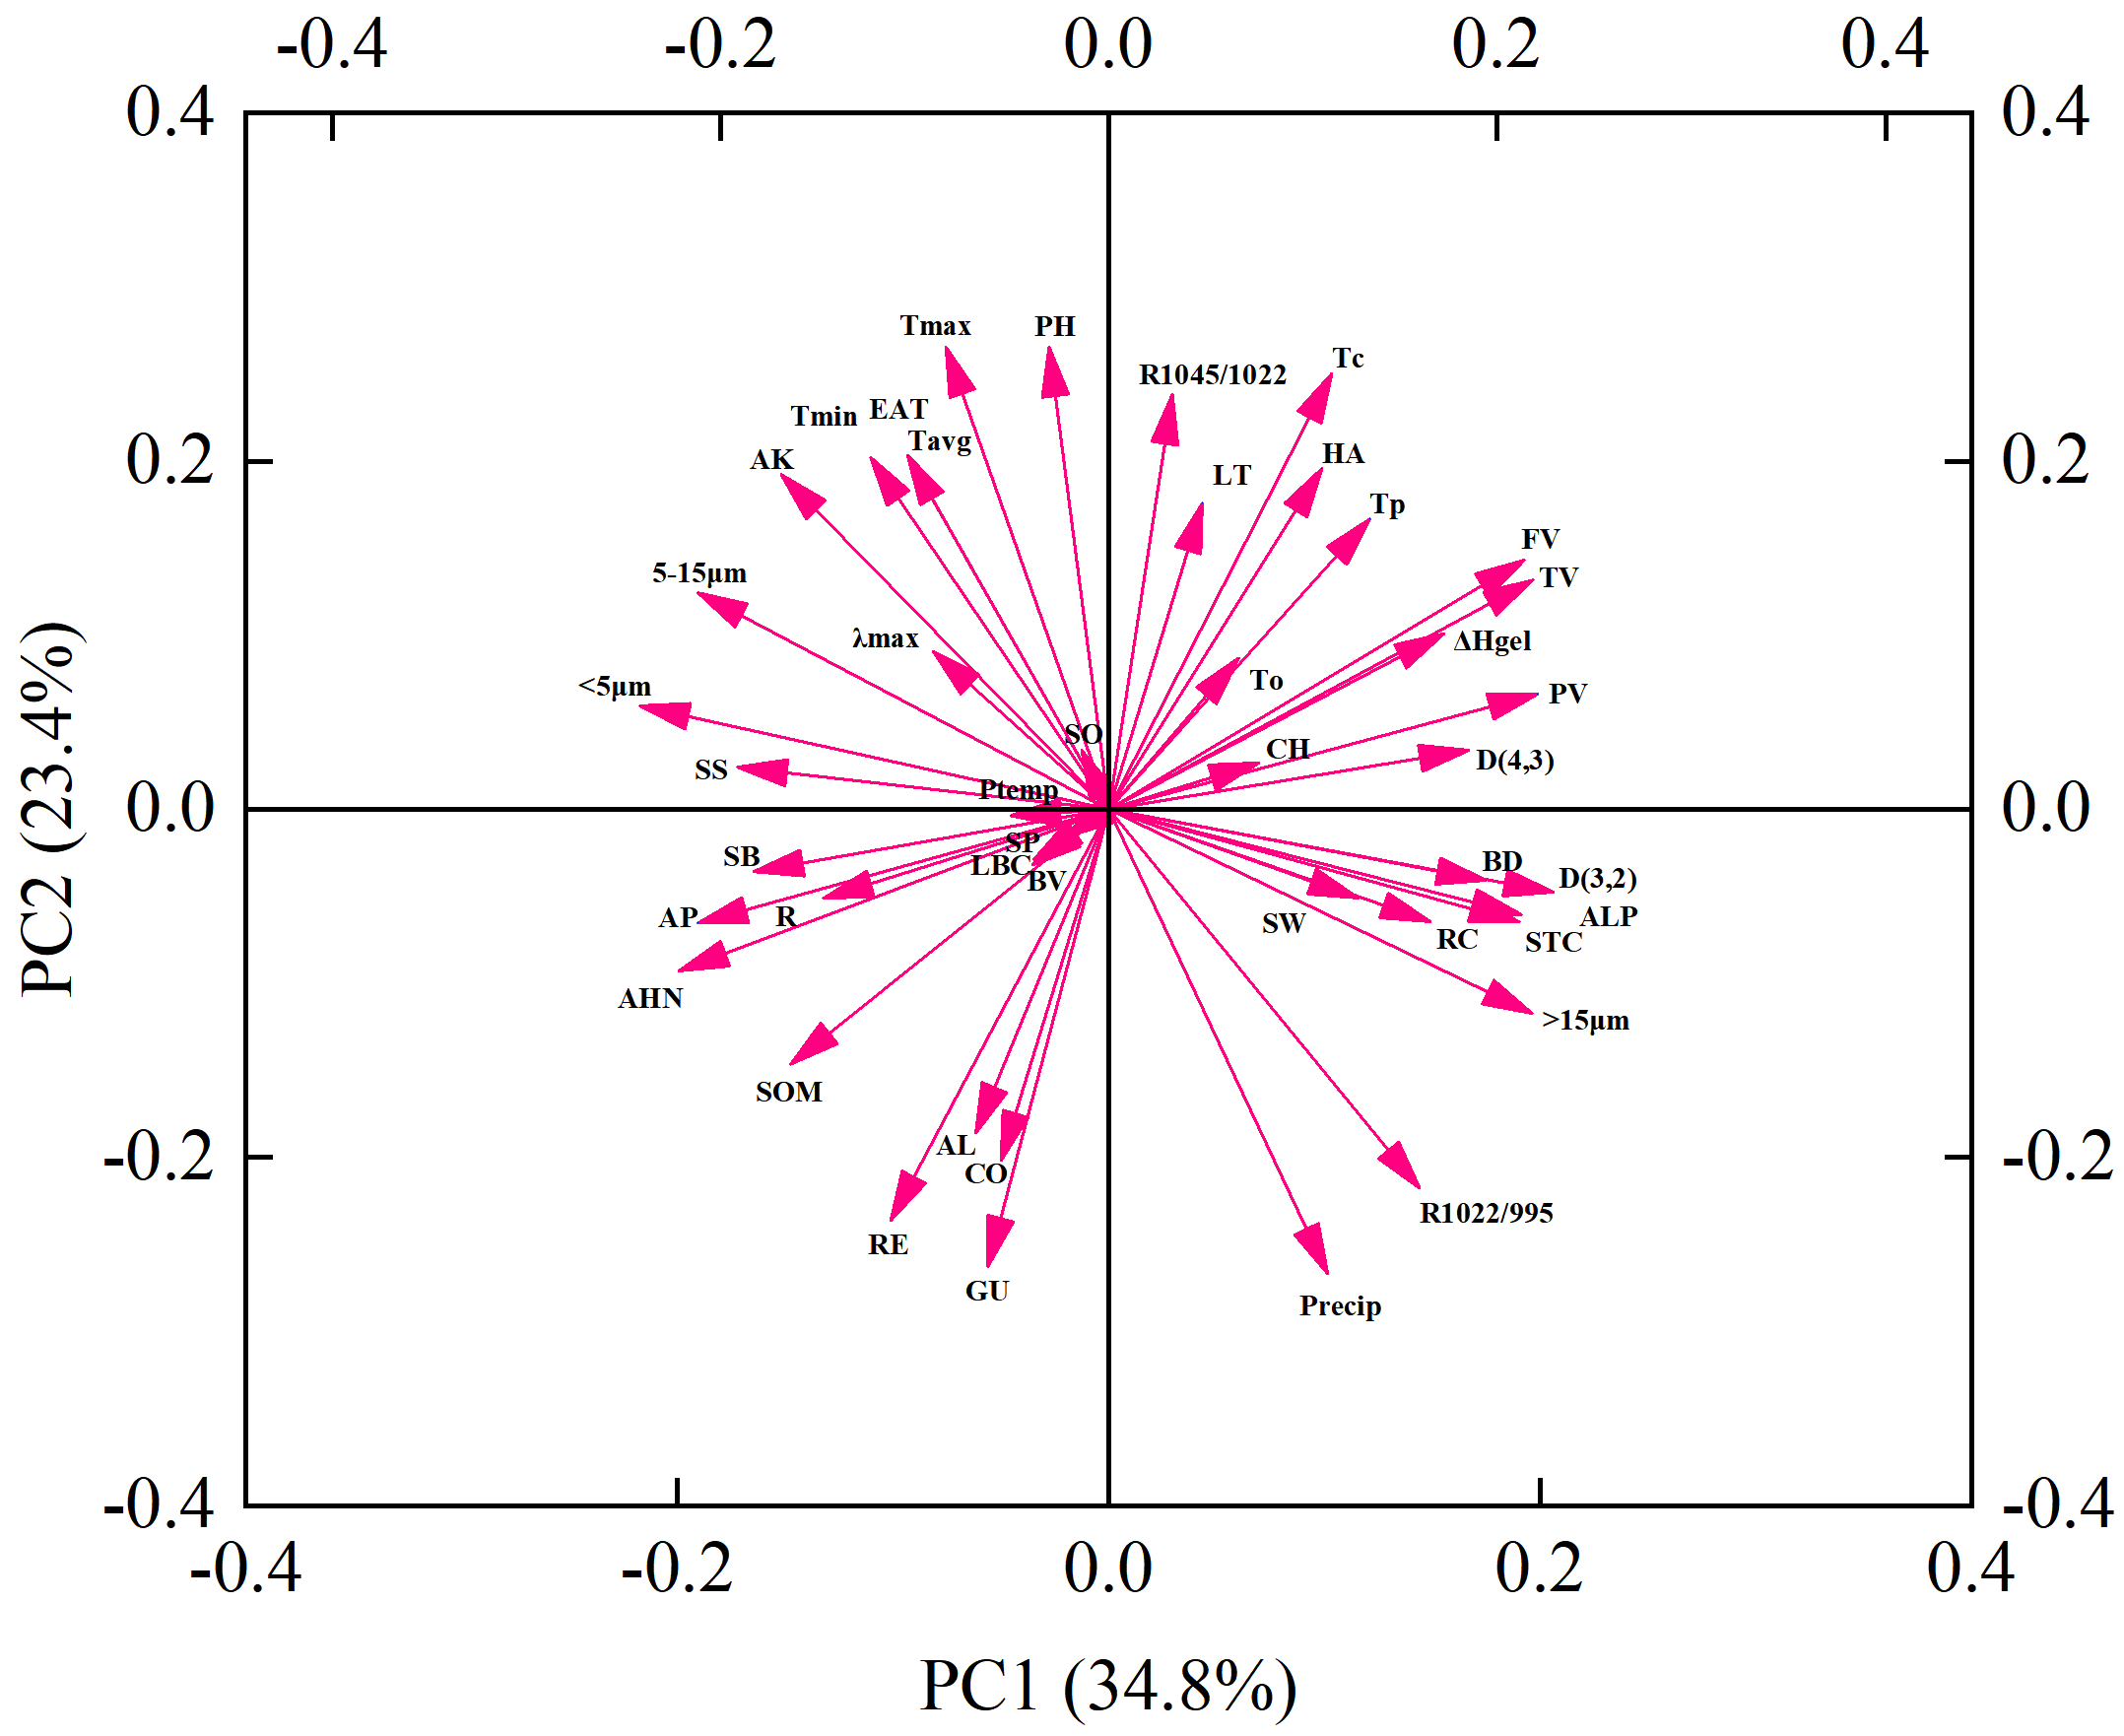

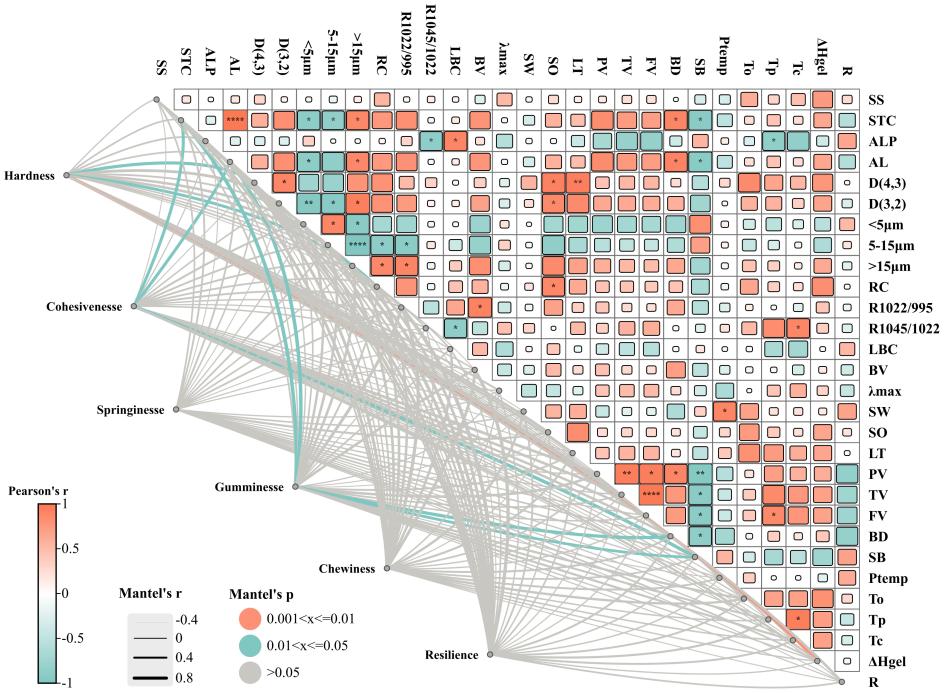


A

B

Fig. S2. Correlation analysis (A) and principal components analysis (B) between the starch content, texture properties, starch structure and physicochemical properties.Significant effects (P < 0.05) are depicted with*. The numbers at the arrows denote standardized path coefficients. Red arrows indicate negative causal flows, and blue arrows indicate positive causal flows. The larger the value of the blue arrow, the thicker the line; the smaller the value of the blue arrow, the thicker the line. SS, soluble sugar content; STC, total starch content; ALP, amylopection content; AL, amylose content; D(4,3), the volume-weighted mean diameter of starch particles; D (3,2), the surface weighted mean diameter of starch particles; 5-15µm, volume distribution of medium starch particles with 5-15µm; >15µm, volume distribution of larger starch particles than 15µm; R1022/995, the ratio of absorbance 1022/995 cm−1; R1045/1022, the ratio of absorbance 1045/1022 cm−1; RC, relative crystallinity; SP, swelling power; SO, solubility; PV, peak viscosity; TV, trough viscosity; FV, final viscosity; BD, breakdown viscosity; SB, setback viscosity; Ptemp, pasting temperature; To, onset temperature; Tp, peak temperature; Tc, completion temperature; △Hgel, phase transition enthalpy of original starch; R, regeneration rate
